# Supplementary material for: Seipin traps triacylglycerols to facilitate their nanoscale clustering in the endoplasmic reticulum membrane
Source: PubMed Central journal article supplement (PMC7857593; doi:10.1371/journal.pbio.3000998), 2021-01-22

# Uncropped immunoblots

Figure 3G

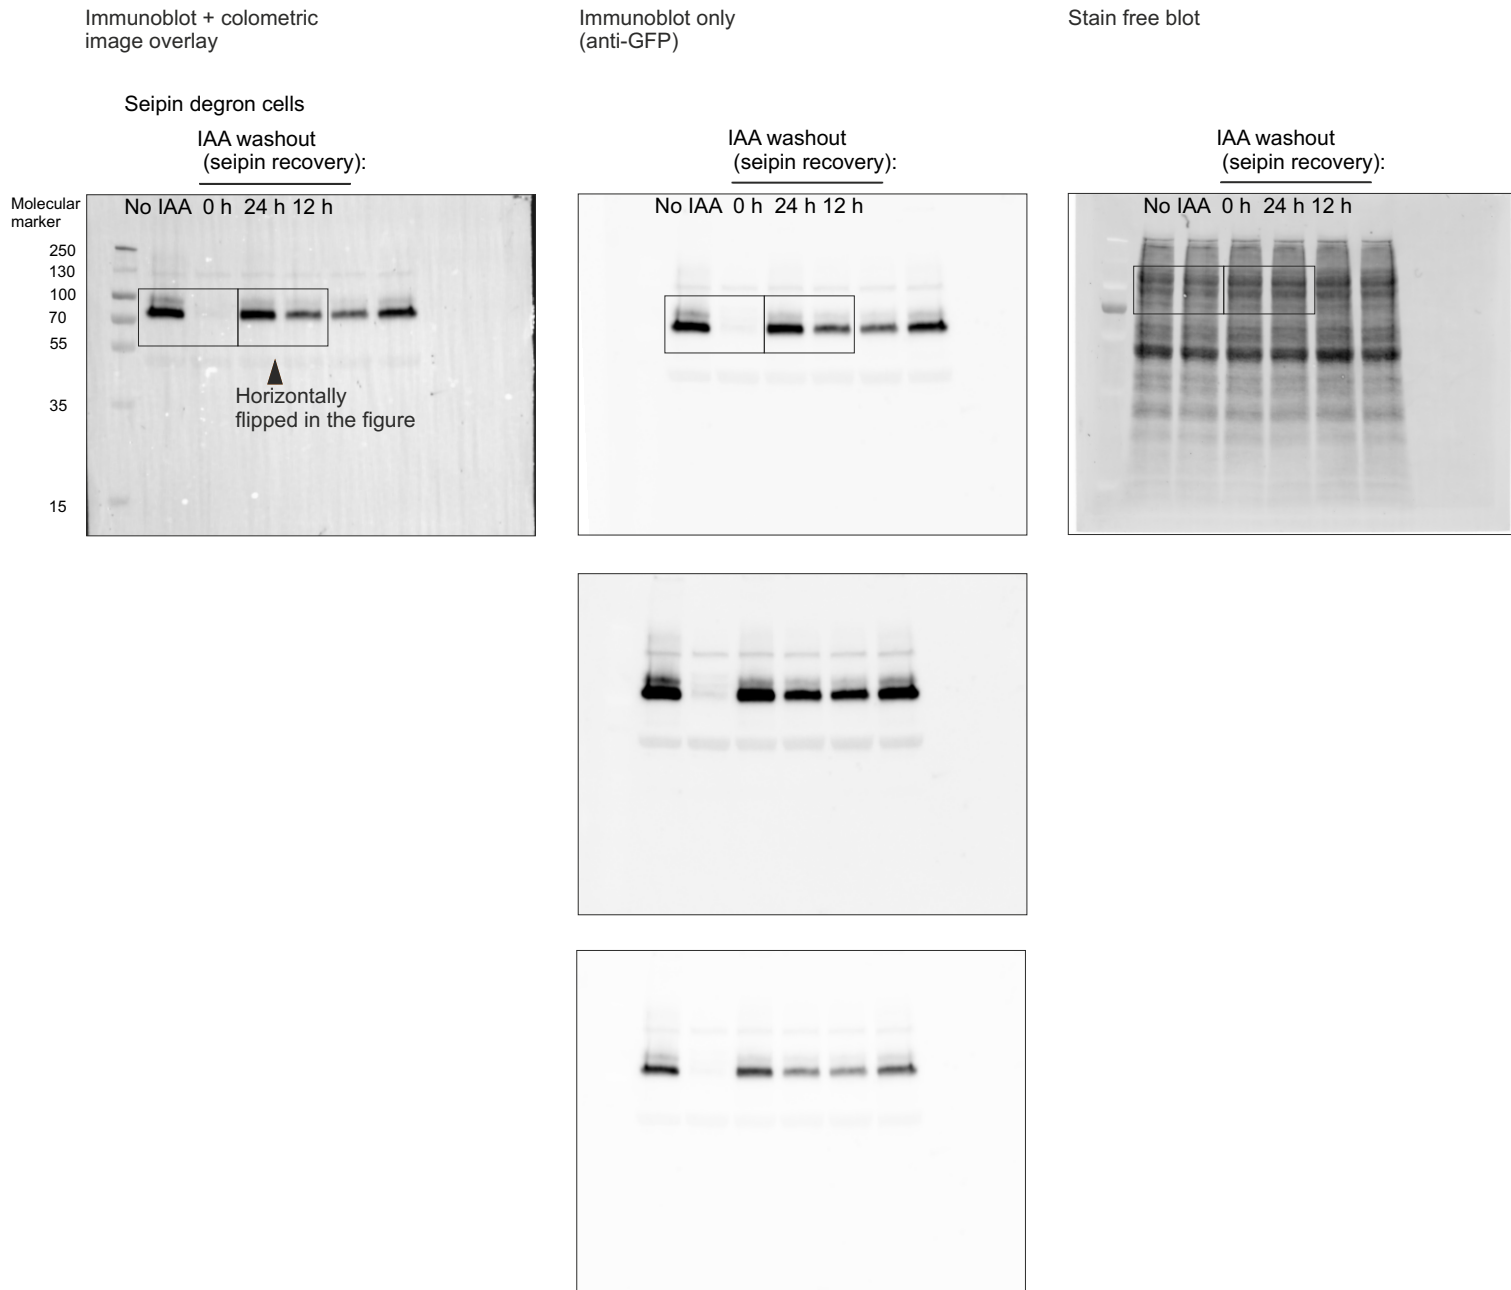

# Uncropped immunoblots

Figure S3A

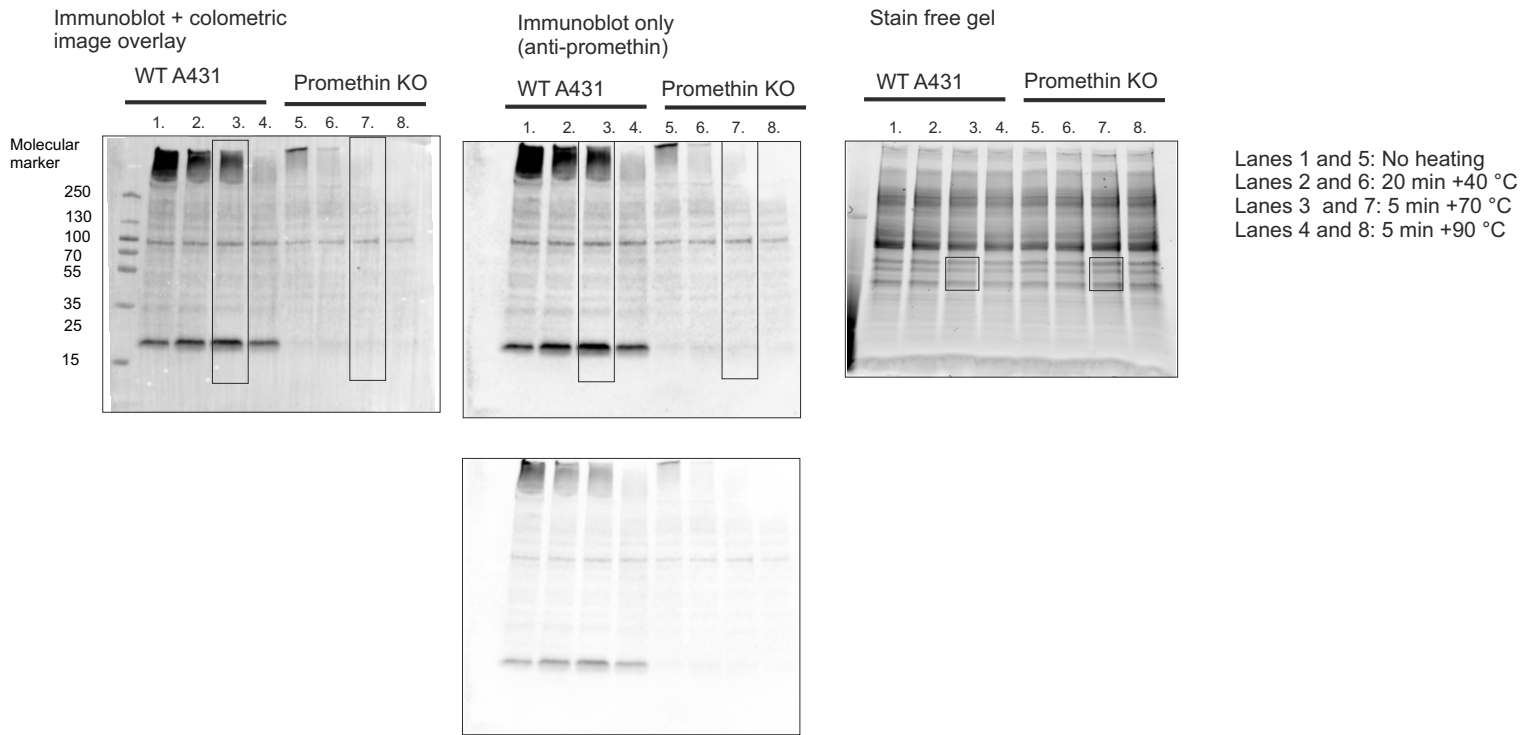

Figure S3G.

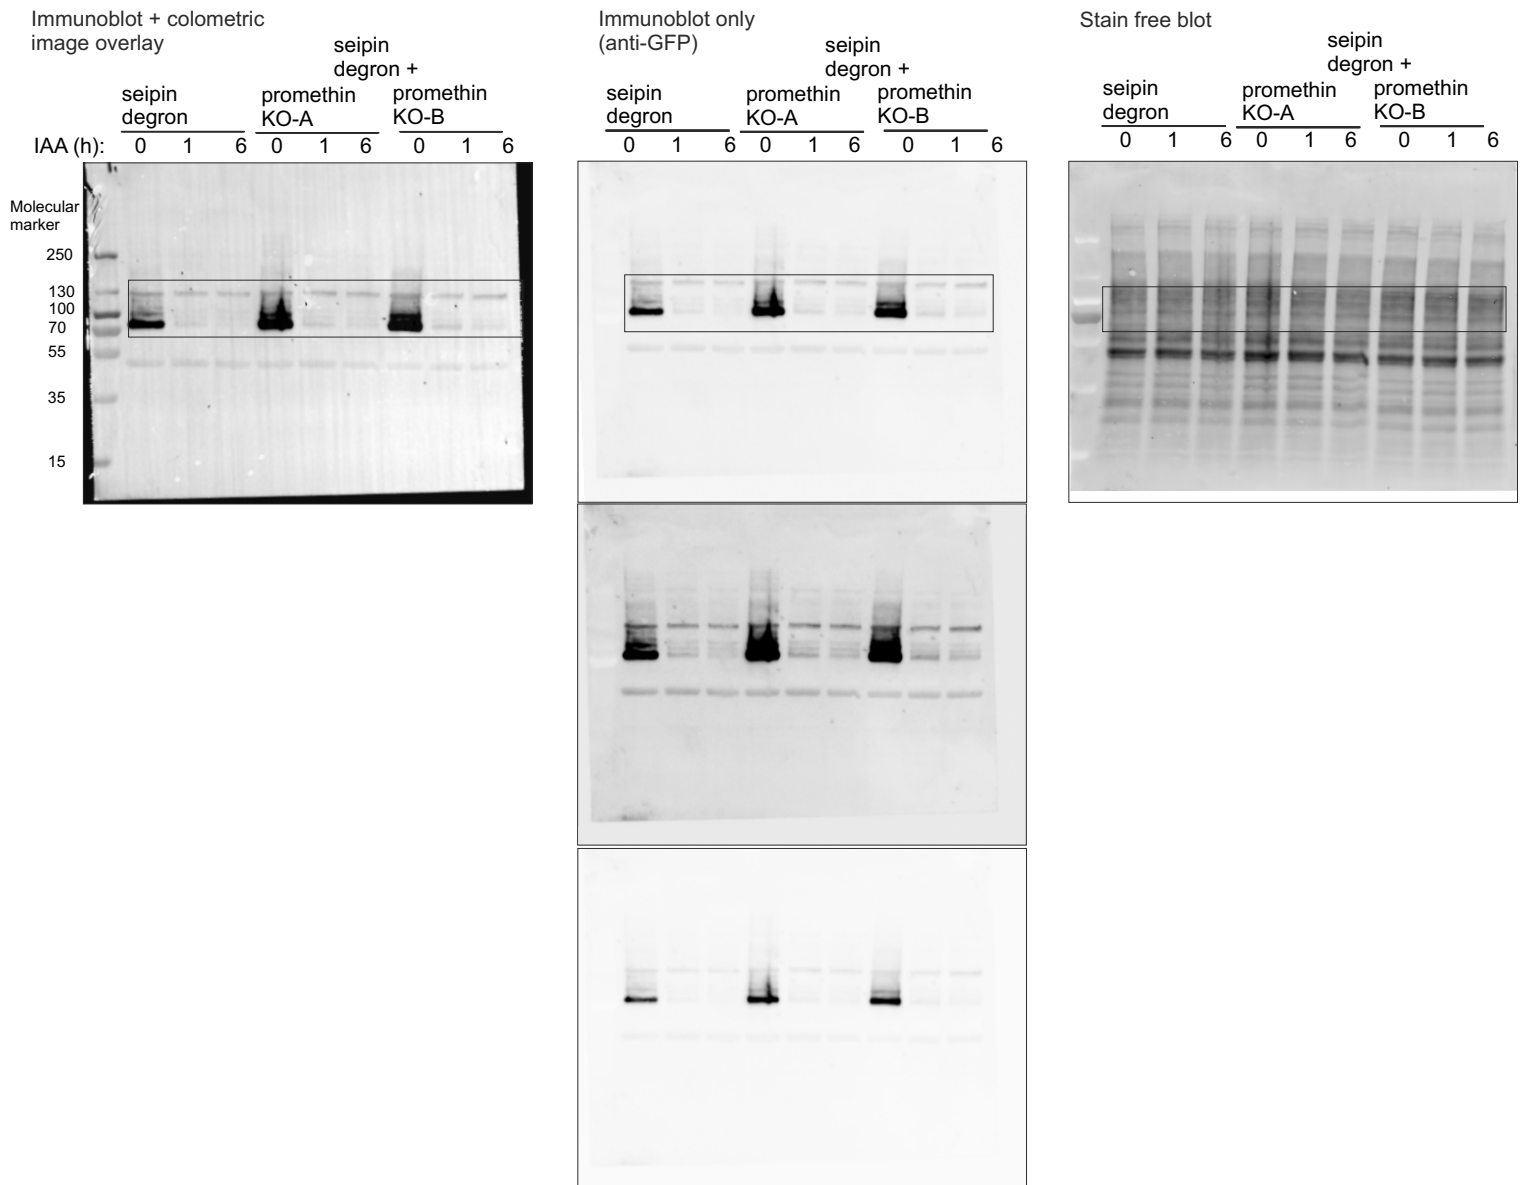

Supplement: pbio.3000998.s006.pdf [file pbio.3000998.s006.pdf]
